# Supplementary material for: Exploiting the pore size and functionalization effects in UiO topology structures for the separation of light hydrocarbons
Source: Royal Society of Chemistry journal article supplement (doi:10.1039/c7ce00187h), 2017-01-01
Supplement: c7ce00187h1.pdf [file c7ce00187h1.pdf]

## 1. Experiments

**UiO-66:** A mixture of zirconium tetrachloride  $\text{ZrCl}_4$ , 1,4-benzenedicarboxylate (BDC), hydrochloric acid and dimethylformamide in the 25 mmol/50 mmol/50 mmol/ 150 mL ratio. The slurry was then introduced in a 750 mL Teflon liner and further introduced in a metallic PAAR bomb. The system was heated 16 h at 220 °C. The resulting white product was filtered off, washed with DMF to remove the excess of unreacted terephthalic acid, then washed again with acetone and dried at room temperature.

**Zr-NDC:**  $\text{ZrCl}_4$  (4.08 g) and 2,6-naphthalenedicarboxylic acid (NDC) (3.78 g) in DMF (200 mL) at room temperature, then 5 mL hydrochloric acid (the molarity is 12 mol/L) was added to get more crystal nucleus. The slurry was then introduced in a 500 mL single-necked flask, then the flask was placed in oil bath and heated 403 K for 24 h. Then, the solution was cooled to room temperature. The resulting white product was filtered off, and washed with DMF and acetone to remove the excess of unreacted NDC, then washed again with methanol and dried under vacuum at 423 K for 8 h.

**UiO-67:** A solution of 4,4'-biphenyldicarboxylate acid (BPDC) (0.25 mmol),  $\text{ZrCl}_4$  (0.25 mmol), 1.3 g benzoic acid and 10 mL DMF was sealed in a 20 mL glass vial and heated at 120 °C for 48 h. The resulting colorless crystals were collected and washed with DMF and acetone and then dried in air.

**Zr-bipy:** Ligand 2,2'-bipyridine-5,5'-dicarboxylate acid (bipy) (0.4 mmol) and  $\text{ZrOCl}_2$  (0.4 mmol) were mixed in DMA (12 mL), with 1.8 g benzoic acid was added as the modulate agent. After 30 minutes of stirring at ambient conditions, the mixture was transferred into a 20 mL glass vial and heated at 413 K for 72 hours. A pure phase of octahedral shaped colorless crystals was obtained by filtration and washed with DMA.

**BUT-11:** A solution of dibenzo [b, d] thiophene-3,7-dicarboxylic acid 5,5-dioxide (DTDAO) (61 mg, 0.2 mmol),  $\text{ZrCl}_4$  (47 mg, 0.2 mmol), and 1.7 mL of acetic acid in 18 mL of DMF was sealed in a 20 mL glass vial and heated at 120 °C for 48 h. The resulting colorless crystals were collected and washed with DMF and acetone and then dried in air.

## 2. Thermogravimetric analysis (TGA)

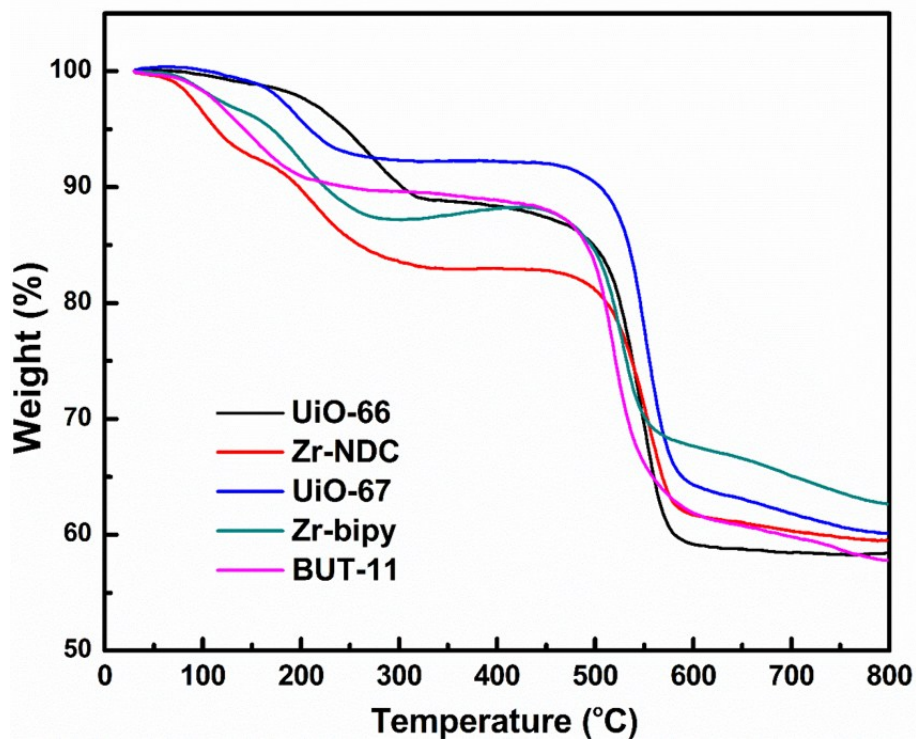

Fig. S1 The TGA of UiO-66, Zr-NDC, UiO-67, Zr-bipy and BUT-11

## 3. Single-component adsorption measurements at 273 K

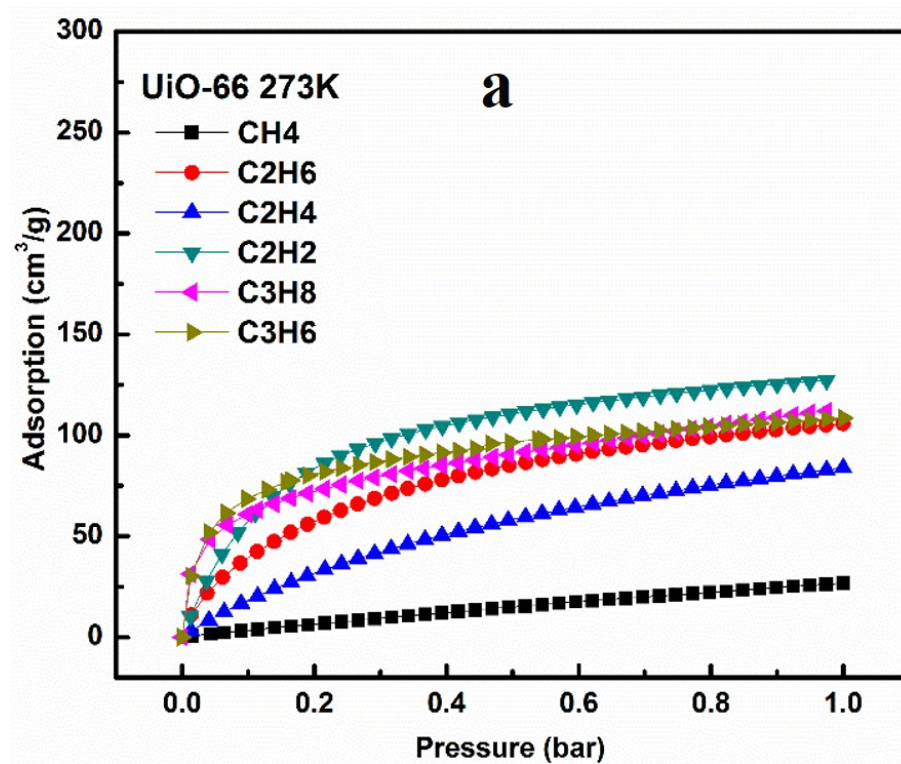

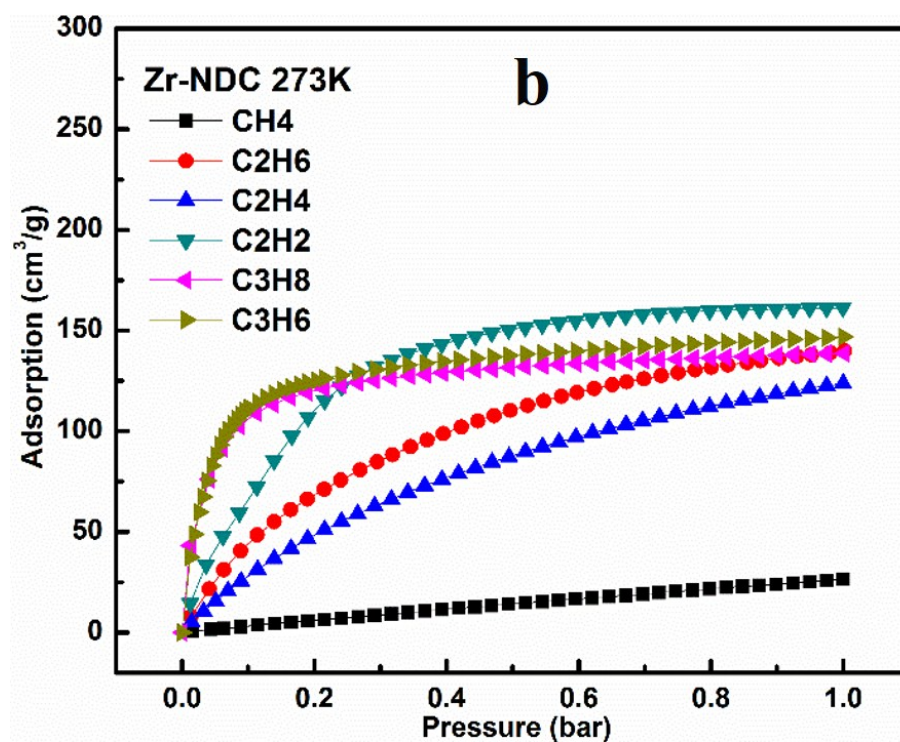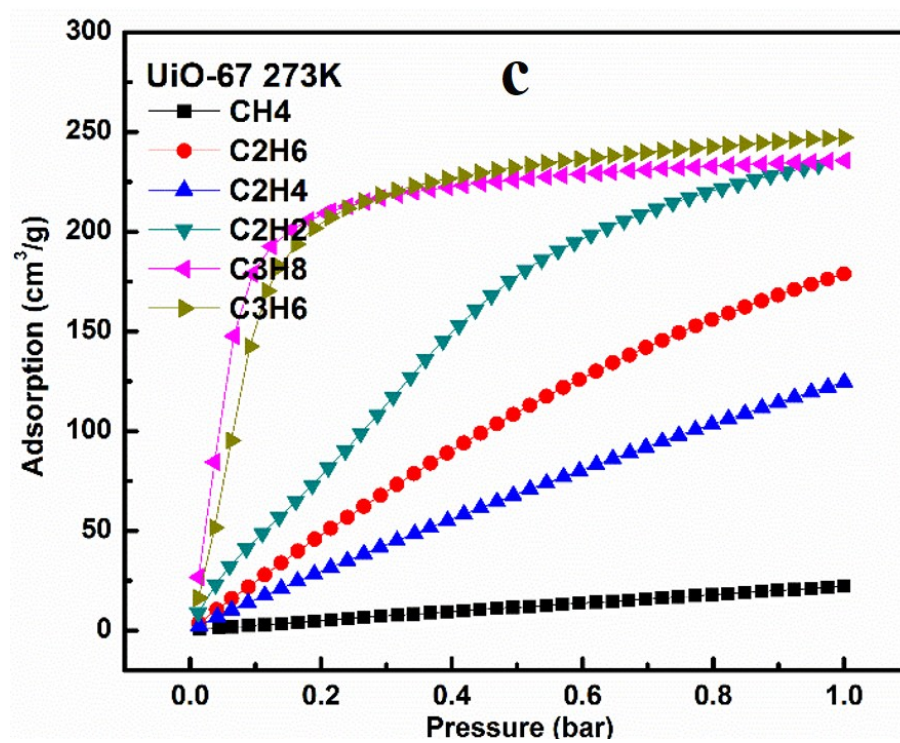



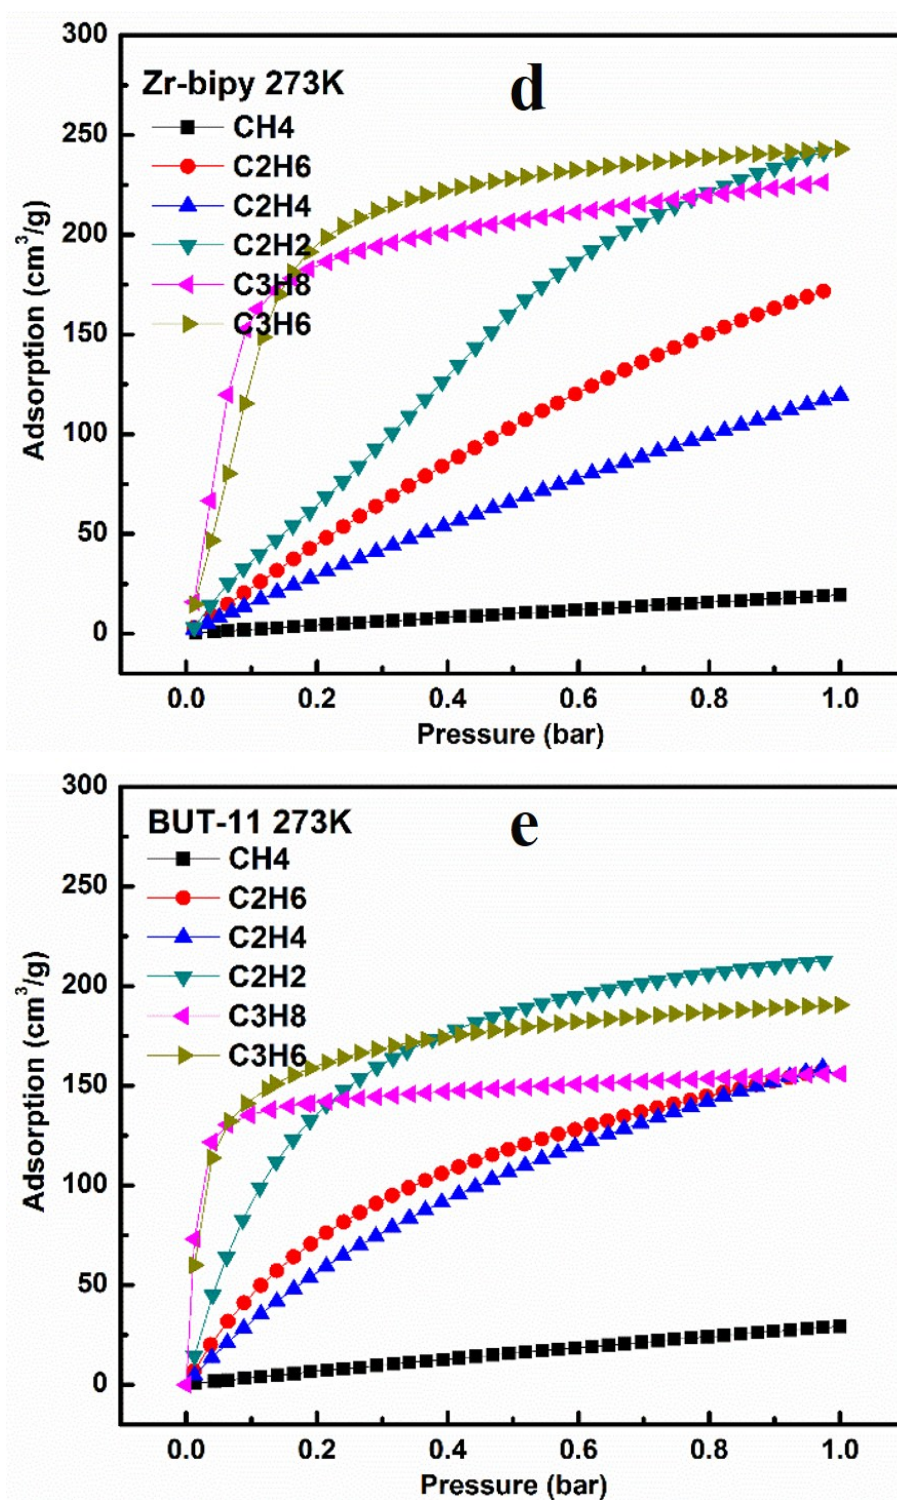

Fig. S2 UiO-66 (a), Zr-NDC (b), UiO-67 (c), Zr-bipy (d) and BUT-11 (e) of light hydrocarbons adsorption isotherms at 273 K.

#### 4. Isosteric Heat of Adsorption

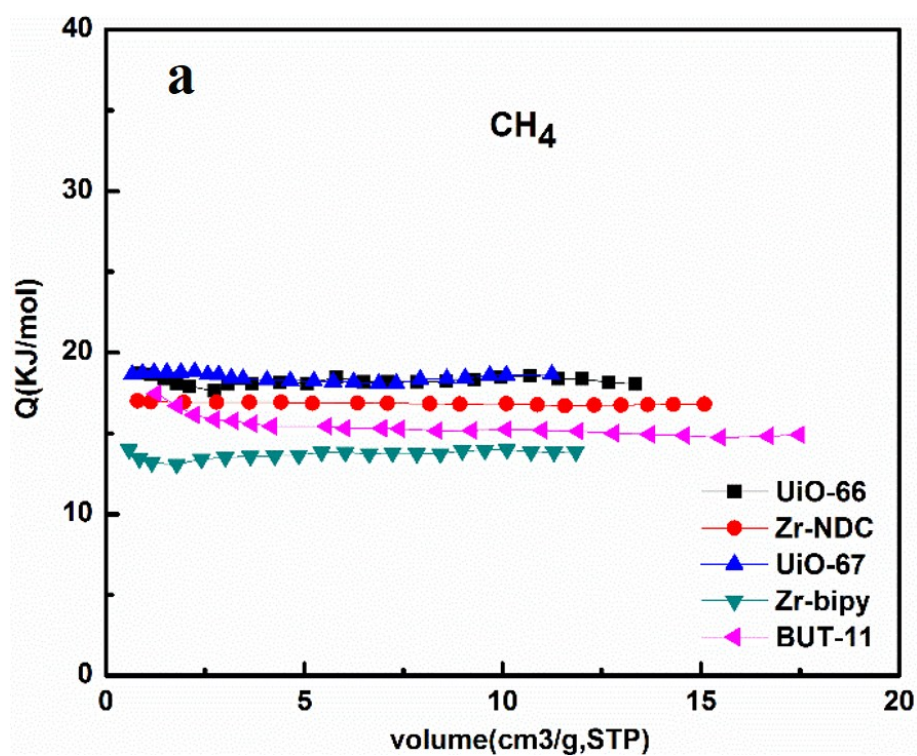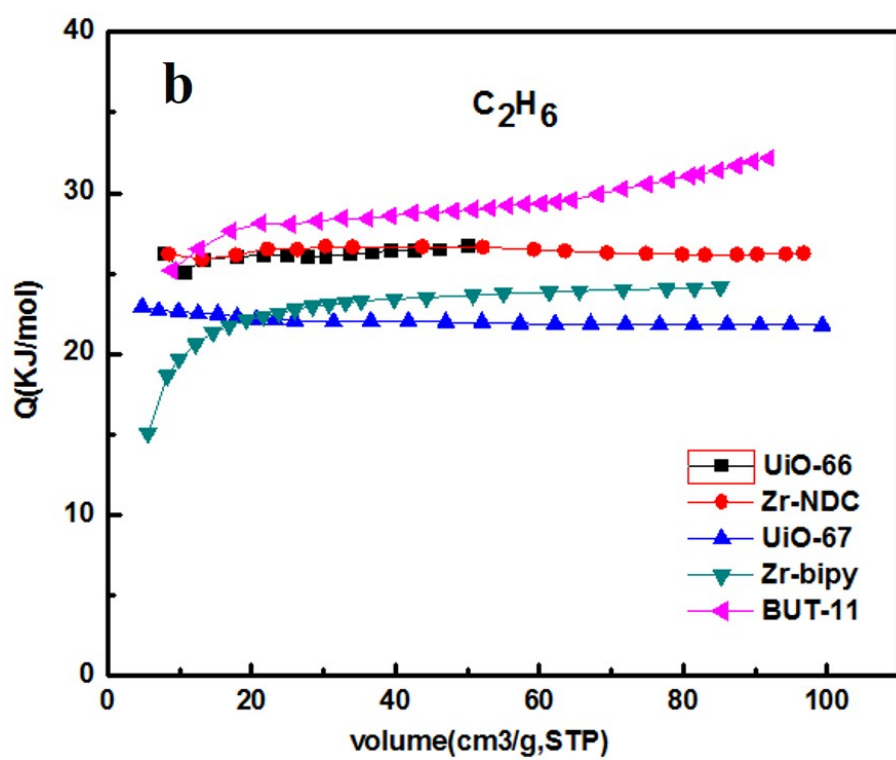

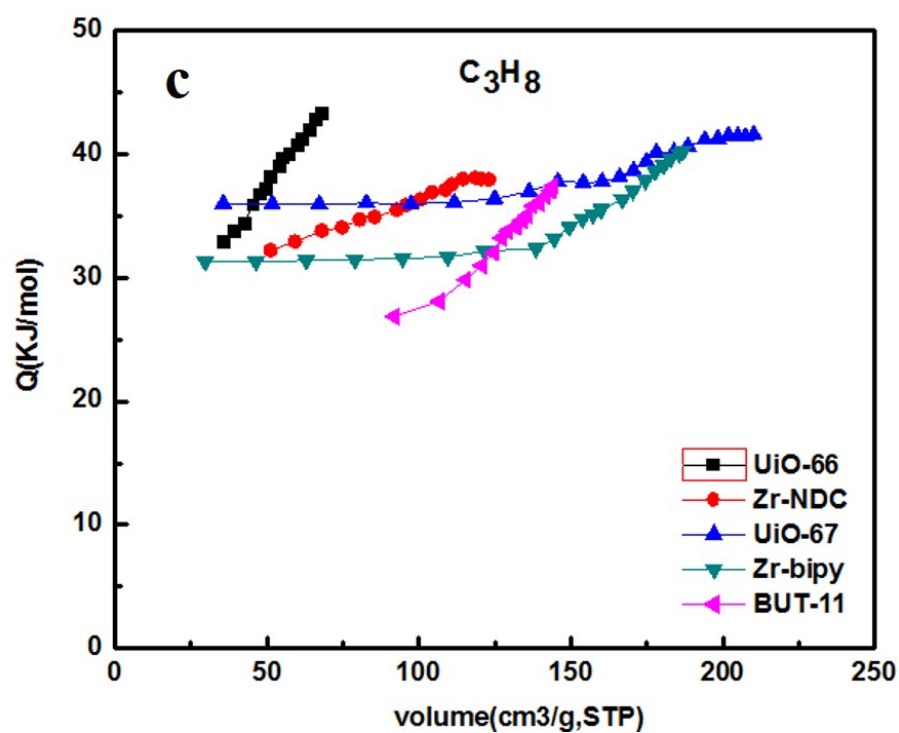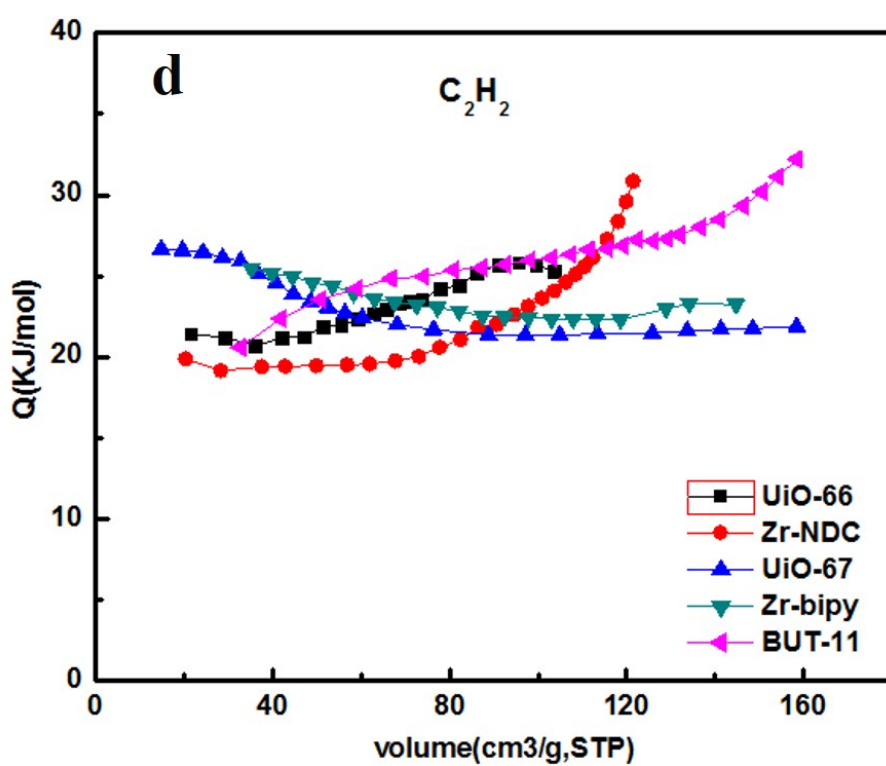

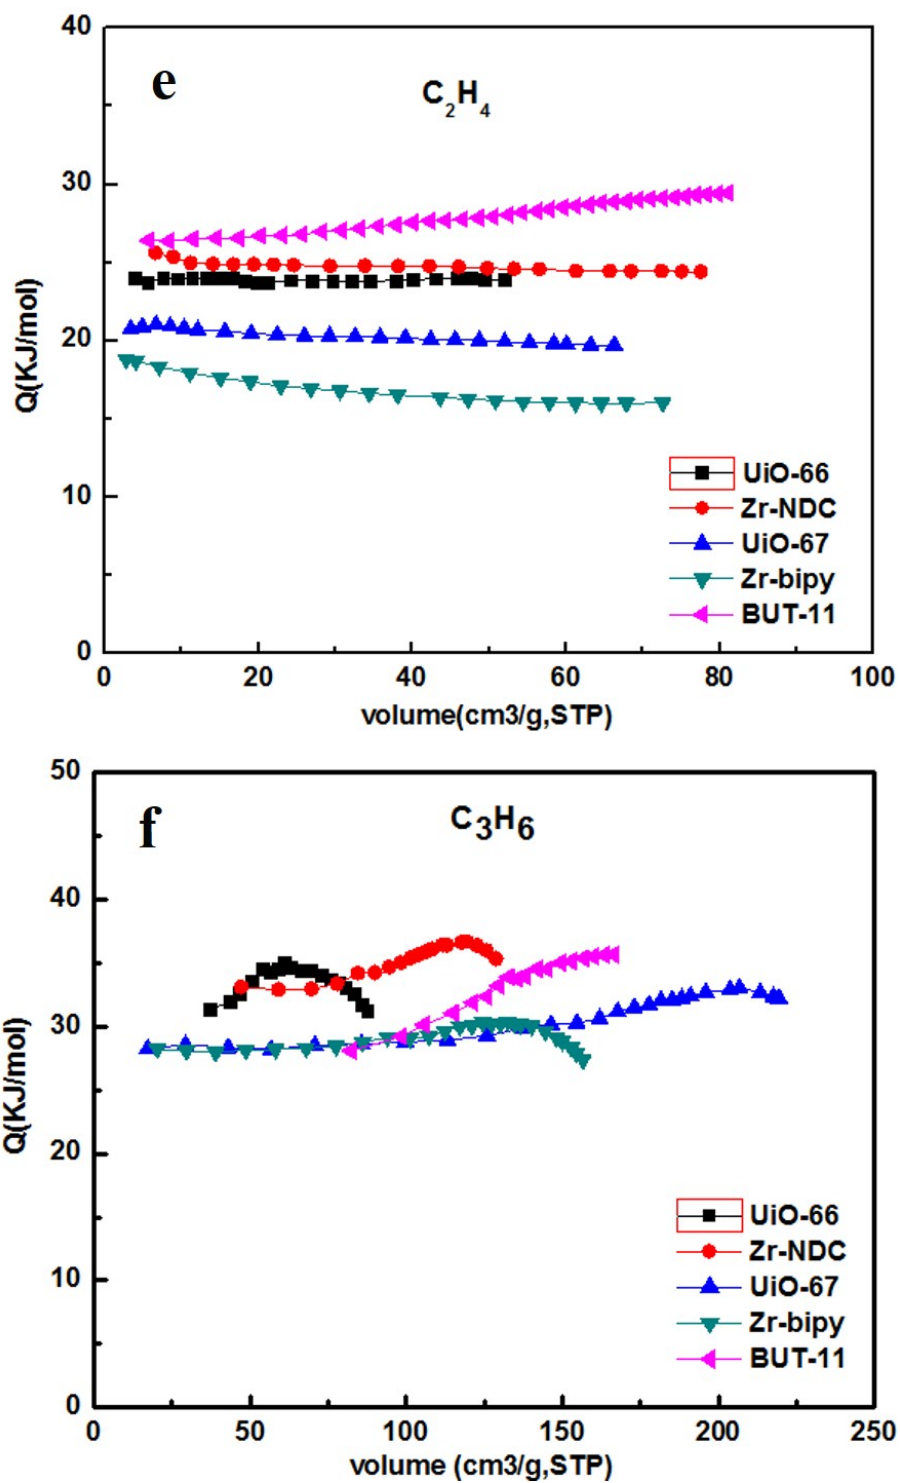

Fig. S3 Adsorption heats for  $CH_4$ ,  $C_2H_6$ ,  $C_3H_8$ ,  $C_2H_2$ ,  $C_2H_4$  and  $C_3H_6$  on UiO-66 (black), Zr-NDC (red), UiO-67 (blue), Zr-bipy (olive) and BUT-11(magenta).

## 5. Breakthrough Experiments



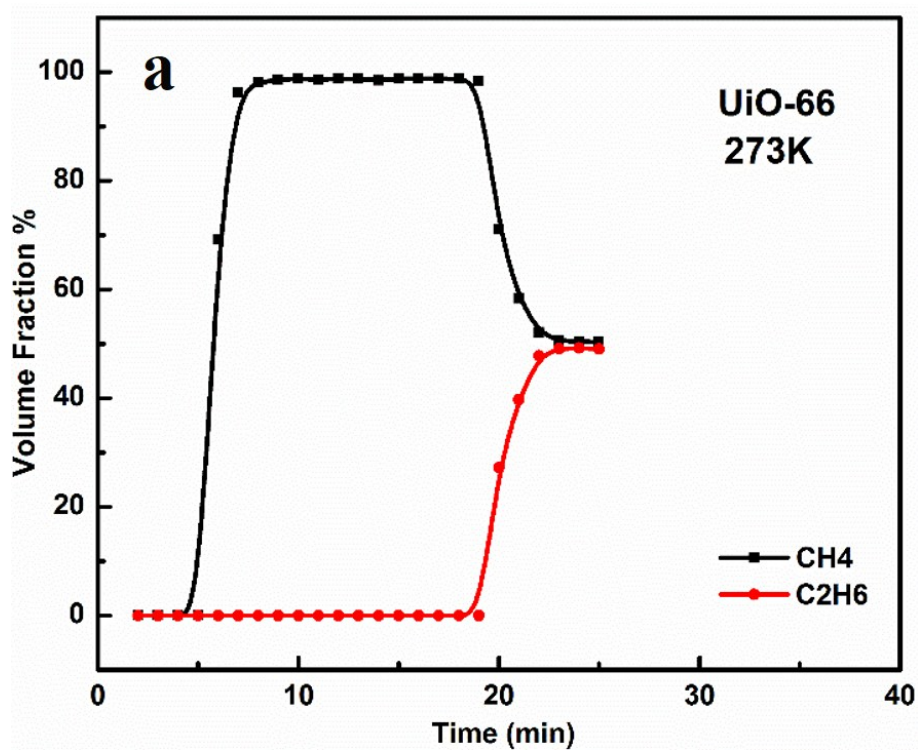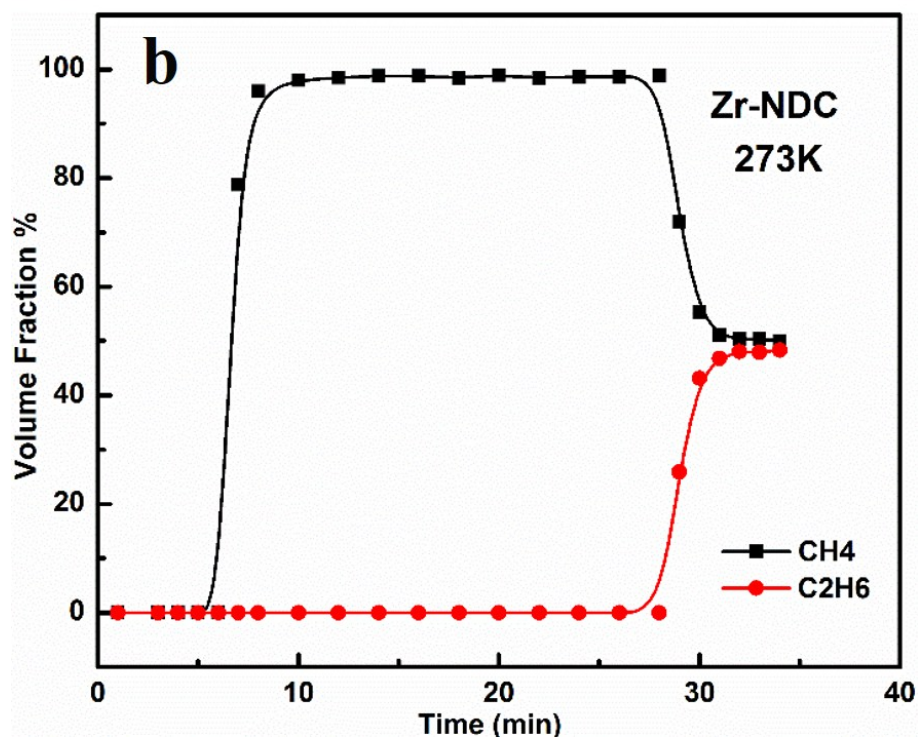



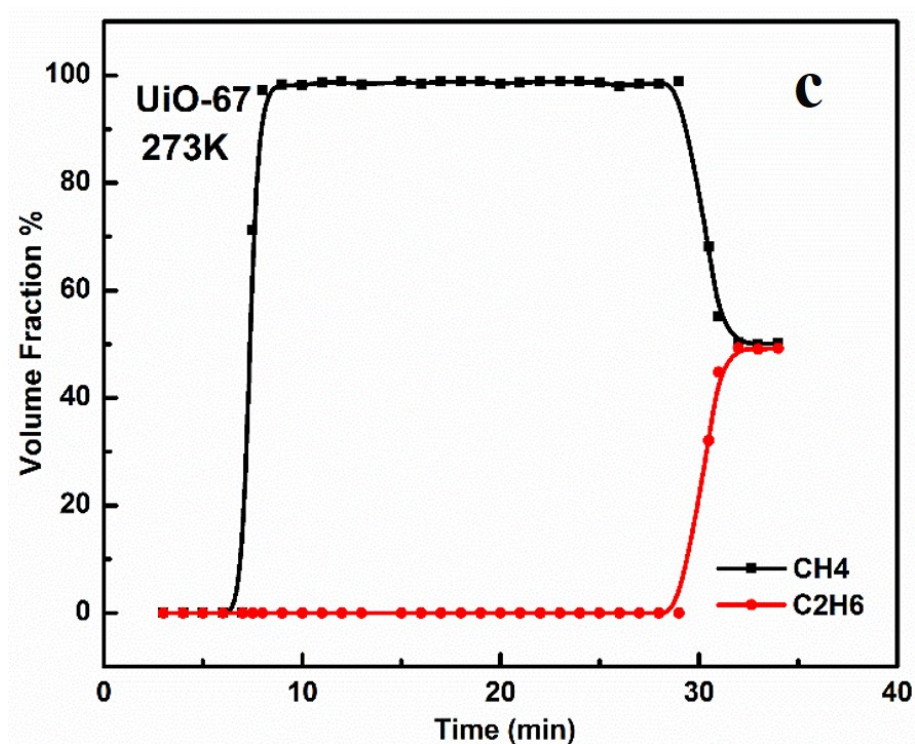

Fig. S4 Breakthrough experiments of UiO-66 (a), Zr-NDC (b) and UiO-67 (c) for separation of equimolar 2-component CH<sub>4</sub>/C<sub>2</sub>H<sub>6</sub> mixtures in a fixed bed of adsorbent at 273 K.

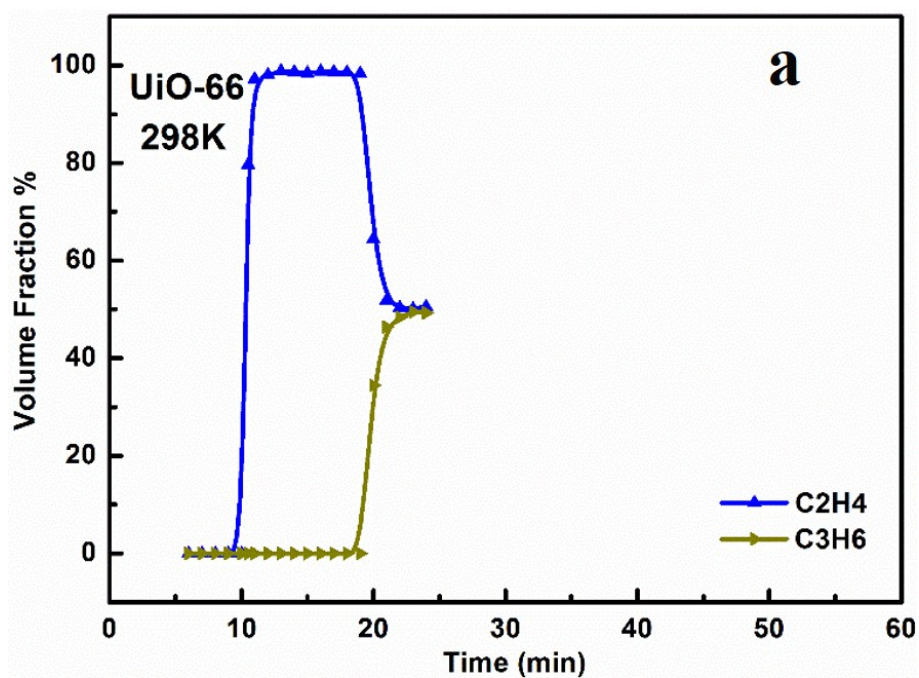

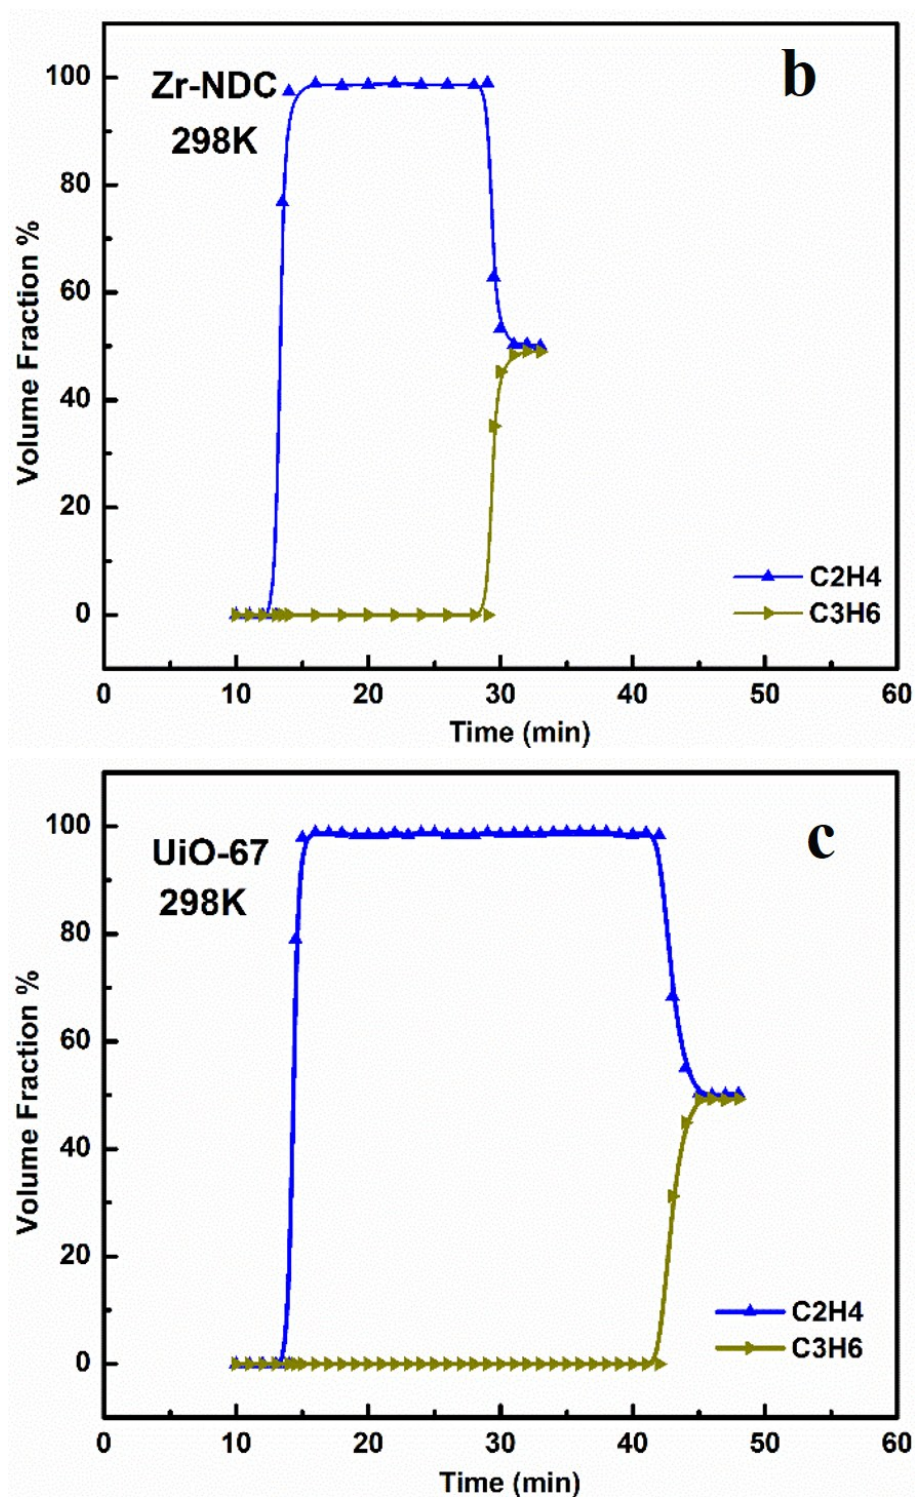

Fig. S5 Breakthrough experiments of UiO-66 (a), Zr-NDC (b) and UiO-67 (c) for separation of equimolar 2-component  $C_2H_4/C_3H_6$  mixtures in a fixed bed of adsorbent at 298 K.

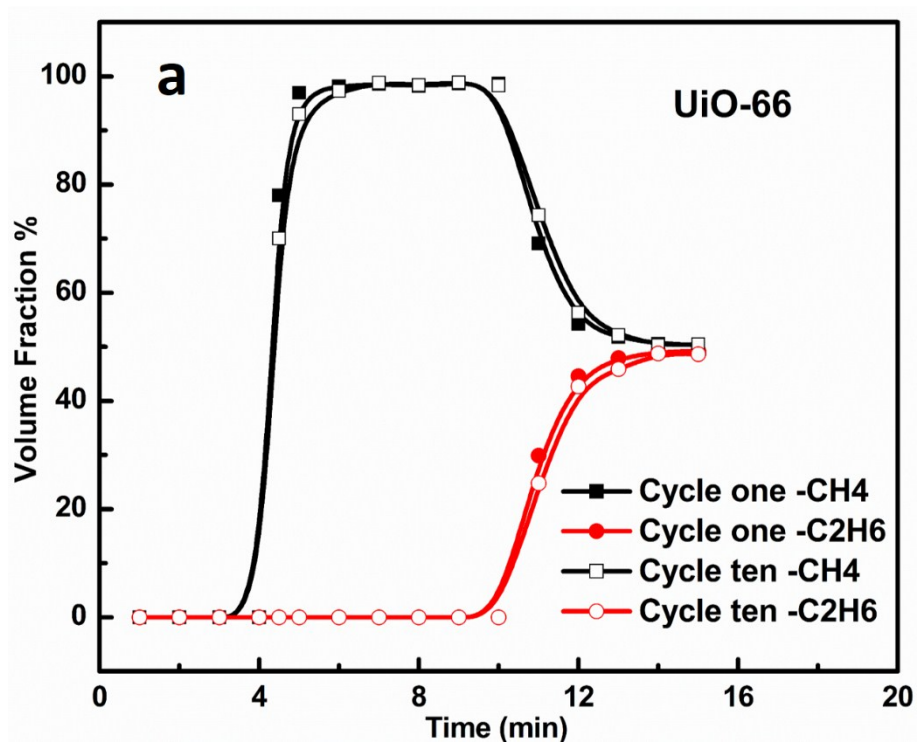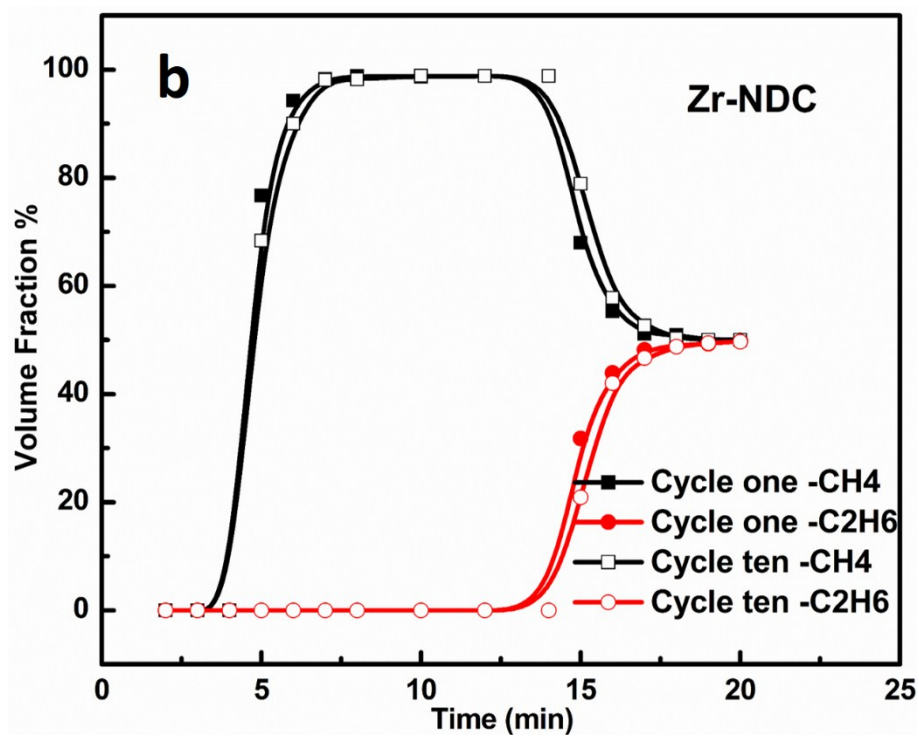

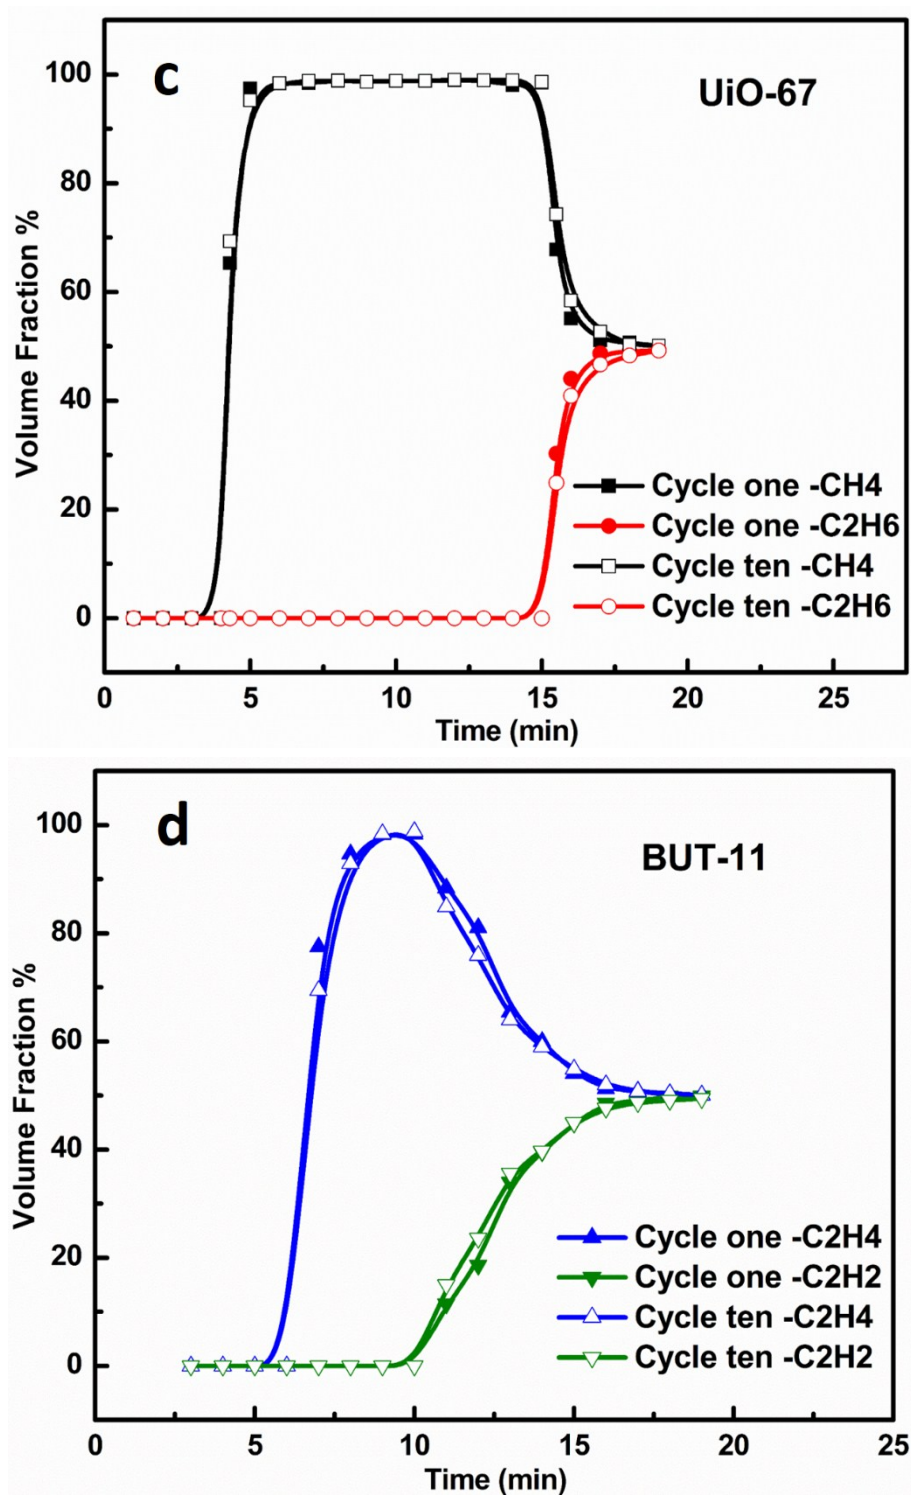

Fig. S6 Separation cycling experiments for CH<sub>4</sub>/C<sub>2</sub>H<sub>6</sub> (50%/50%) mixtures on UiO-66 (a), Zr-NDC(b), UiO-67(c) and C<sub>2</sub>H<sub>4</sub>/C<sub>2</sub>H<sub>2</sub> (50%/50%) mixtures on BUT-11(d) at 298 K and 1 bar.



| Samples          | The breakthrough time (min)   |                               |                                                              |
|------------------|-------------------------------|-------------------------------|--------------------------------------------------------------|
|                  | CH <sub>4</sub>               | C <sub>2</sub> H <sub>6</sub> | C <sub>2</sub> H <sub>6</sub> -CH <sub>4</sub>               |
| UiO-66           | 4.5                           | 11.0                          | 6.5                                                          |
| Zr-NDC           | 5.0                           | 15.0                          | 10.0                                                         |
| UiO-67           | 4.3                           | 15.5                          | 11.2                                                         |
|                  | C <sub>2</sub> H <sub>6</sub> | C <sub>3</sub> H <sub>8</sub> | C <sub>3</sub> H <sub>8</sub> -C <sub>2</sub> H <sub>6</sub> |
|                  |                               |                               |                                                              |
| UiO-66           | 11.0                          | 20.0                          | 9.0                                                          |
| Zr-NDC           | 15.0                          | 27.0                          | 12.0                                                         |
| UiO-67           | 15.5                          | 44.0                          | 28.5                                                         |
|                  | C <sub>2</sub> H <sub>4</sub> | C <sub>3</sub> H <sub>6</sub> | C <sub>3</sub> H <sub>6</sub> -C <sub>2</sub> H <sub>4</sub> |
|                  |                               |                               |                                                              |
| UiO-66           | 10.5                          | 20.0                          | 9.5                                                          |
| Zr-NDC           | 13.5                          | 29.5                          | 16.0                                                         |
| UiO-67           | 14.5                          | 43.0                          | 28.5                                                         |
| Raw gas ratio    | C <sub>2</sub> H <sub>4</sub> | C <sub>2</sub> H <sub>2</sub> | C <sub>2</sub> H <sub>2</sub> -C <sub>2</sub> H <sub>4</sub> |
|                  |                               |                               |                                                              |
| BUT-11 (50%:50%) | 7.0                           | 11.0                          | 4                                                            |
| (99%:1%)         | 6.3                           | 16.5                          | 10.2                                                         |

Table.S1 Breakthrough times for gas separation experiments using light hydrocarbons mixtures at 298 K and 1 bar.

## 6. SEM of the studied MOFs

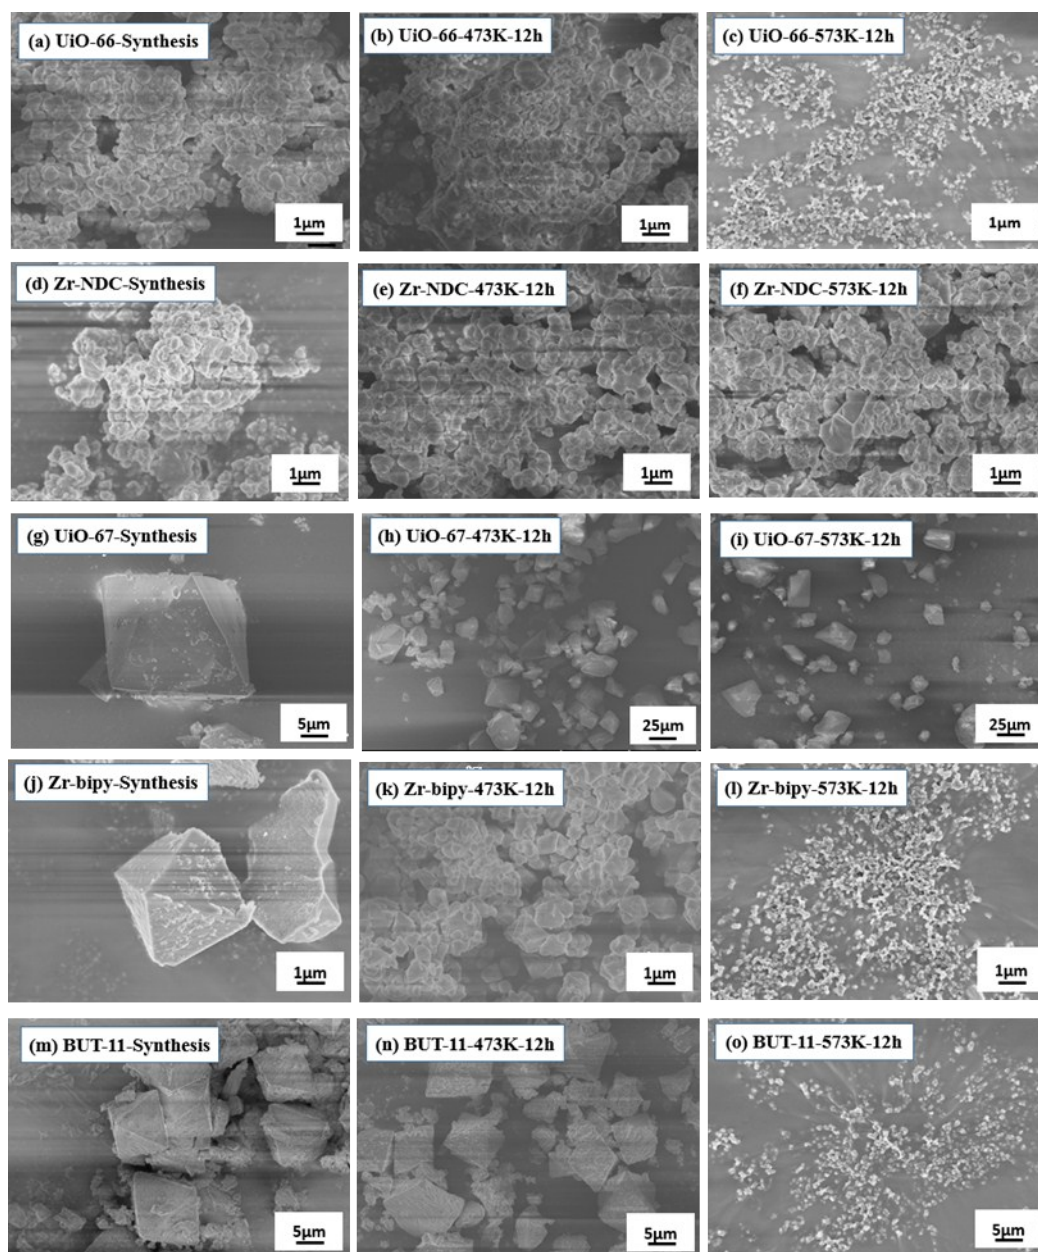

Fig. S7 SEM of the UiO-66, Zr-NDC, UiO-67, Zr-bipy and BUT-11. (left: synthesis; middle: Vacuum 12h at 473K; right: Vacuum 12h at 573K)
